# Supplementary material for: Homogeneous electrochemical water oxidation catalyzed by cobalt complexes with an amine–pyridine ligand
Source: Royal Society of Chemistry journal article supplement (doi:10.1039/d2se01431a), 2022-11-22
Supplement: d2se01431a1.pdf [file d2se01431a1.pdf]

## **Homogeneous electrochemical water oxidation catalyzed by cobalt complexes with amine-pyridine ligand**

Yanmei Chen<sup>a\*</sup>, Xiangyu Meng<sup>b</sup>, Xiaoli Chen<sup>a</sup>, Xinyi Li<sup>a</sup>, Hui Ye<sup>a</sup>, Shanshan Liu<sup>a</sup>, Zhijun Ruan<sup>a</sup>, Xiangming Liang<sup>c\*</sup>, Junqi Lin<sup>a\*</sup>

<sup>a</sup> Hubei Key Laboratory of Processing and Application of Catalytic Materials, College of Chemistry and Chemical Engineering, Huanggang Normal University, Huanggang, 438000 China. Email: cingym@163.com, linjunqi@hgnu.edu.cn.

<sup>b</sup> Henan Provincial Key Laboratory of Nanocomposites and Applications, Institute of Nanostructured Functional Materials, Huanghe Science and Technology College, 666 Zijing Mountain South Road, Zhengzhou, Henan 450006, China.

<sup>c</sup> School of Basic Medical Sciences, Ningxia Medical University, Yinchuan 750004, China.  
Email: liangxm6@163.com

**Table S1** Crystallographic data and processing parameters of complex **1**

| Complex parameters                                  | Complex <b>1</b>                                                                 |
|-----------------------------------------------------|----------------------------------------------------------------------------------|
| Empirical formula                                   | C <sub>21</sub> H <sub>25</sub> N <sub>5</sub> Cl <sub>2</sub> O <sub>8</sub> Co |
| Formula weight                                      | 605.29                                                                           |
| Temperature / K                                     | 280.0                                                                            |
| Wavelength / Å                                      | 0.71073                                                                          |
| Crystal system                                      | Monoclinic                                                                       |
| Space group                                         | Cc                                                                               |
| <i>a</i> / Å                                        | 13.9770(12)                                                                      |
| <i>b</i> / Å                                        | 10.8038(10)                                                                      |
| <i>c</i> / Å                                        | 16.1388(16)                                                                      |
| $\alpha$ / deg                                      | 90                                                                               |
| $\beta$ / deg                                       | 93.597(3)                                                                        |
| $\gamma$ / deg                                      | 90                                                                               |
| Volume / Å <sup>3</sup>                             | 2529.94(40)                                                                      |
| <i>Z</i>                                            | 4                                                                                |
| Calculated density / Mg m <sup>3</sup>              | 1.58905                                                                          |
| Absorption coefficient / mm <sup>-1</sup>           | 0.946                                                                            |
| <i>F</i> (000)                                      | 1244                                                                             |
| Crystal size / mm <sup>3</sup>                      | 0.320 × 0.260 × 0.310                                                            |
| $\theta$ range / deg                                | 2.60 to 25.01                                                                    |
|                                                     | -18 ≤ <i>h</i> ≤ 18                                                              |
| Index ranges                                        | -14 ≤ <i>h</i> ≤ 14                                                              |
|                                                     | -20 ≤ <i>h</i> ≤ 20                                                              |
| Reflections collected                               | 27821                                                                            |
| Independent reflections                             | 5777 [ <i>R</i> (int) = 0.0607]                                                  |
| Completeness to theta                               | 99.5% (25.01°)                                                                   |
| Refinement method                                   | Full-matrix least-squares on <i>F</i> <sup>2</sup>                               |
| Data / restraints / parameters                      | 5777 / 2 / 336                                                                   |
| Goodness-of-fit on <i>F</i> <sup>2</sup>            | 1.028                                                                            |
| Final <i>R</i> indices [ <i>I</i> > 2σ( <i>I</i> )] | <i>R</i> <sub>1</sub> = 0.0669, <i>wR</i> <sub>2</sub> = 0.0951                  |
| <i>R</i> indices (all data)                         | <i>R</i> <sub>1</sub> = 0.0406, <i>wR</i> <sub>2</sub> = 0.1072                  |
| Largest diff. peak and hole                         | 0.354 and -0.384 e.Å <sup>-3</sup>                                               |

$$R_1 = \Sigma||F_o| - |F_c||/\Sigma|F_o|, wR_2 = [\Sigma(|F_o|^2 - |F_c|^2)^2/\Sigma(F_o2)]^{1/2}$$

**Table S2** Crystallographic data and processing parameters of complex **2** and  $[\text{Zn}(\text{N3Py2})(\text{OH}_2)](\text{ClO}_4)_2$ 

| Complex parameters                        | Complex <b>2</b>                                                     | $[\text{Zn}(\text{N3Py2})(\text{OH}_2)](\text{ClO}_4)_2$             |
|-------------------------------------------|----------------------------------------------------------------------|----------------------------------------------------------------------|
| Empirical formula                         | $\text{C}_{19}\text{H}_{31}\text{N}_5\text{Cl}_2\text{O}_9\text{Co}$ | $\text{C}_{19}\text{H}_{31}\text{N}_5\text{Cl}_2\text{O}_9\text{Zn}$ |
| Formula weight                            | 603.32                                                               | 609.76                                                               |
| Temperature / K                           | 273.2                                                                | 273.0                                                                |
| Wavelength / Å                            | 0.71073                                                              | 0.71073                                                              |
| Crystal system                            | Monoclinic                                                           | Monoclinic                                                           |
| Space group                               | $P2_1/c$                                                             | $P2_1/c$                                                             |
| $a$ / Å                                   | 9.0629 (18)                                                          | 9.0470(13)                                                           |
| $b$ / Å                                   | 33.221 (8)                                                           | 33.224(4)                                                            |
| $c$ / Å                                   | 8.842 (2)                                                            | 8.7975(14)                                                           |
| $\alpha$ / deg                            | 90                                                                   | 90                                                                   |
| $\beta$ / deg                             | 104.732 (9)                                                          | 104.960(5)                                                           |
| $\gamma$ / deg                            | 90                                                                   | 90                                                                   |
| Volume / Å <sup>3</sup>                   | 2574.6 (11)                                                          | 2554.7(6)                                                            |
| $Z$                                       | 4                                                                    | 4                                                                    |
| Calculated density / Mg m <sup>3</sup>    | 1.557                                                                | 1.585                                                                |
| Absorption coefficient / mm <sup>-1</sup> | 0.931                                                                | 1.228                                                                |
| $F(000)$                                  | 1252                                                                 | 1264                                                                 |
| Crystal size / mm <sup>3</sup>            | $0.220 \times 0.210 \times 0.170$                                    | $0.270 \times 0.290 \times 0.260$                                    |
| $\theta$ range / deg                      | 2.60 to 25.01                                                        | 2.33 to 26.38                                                        |
|                                           | $-11 \leq h \leq 11$                                                 | $-11 \leq h \leq 11$                                                 |
| Index ranges                              | $-43 \leq h \leq 43$                                                 | $-41 \leq h \leq 41$                                                 |
|                                           | $-11 \leq h \leq 11$                                                 | $-11 \leq h \leq 11$                                                 |
| Reflections collected                     | 29858                                                                | 61767                                                                |
| Independent reflections                   | 5876 [ $R(\text{int}) = 0.0638$ ]                                    | 5215 [ $R(\text{int}) = 0.0607$ ]                                    |
| Completeness to theta                     | 99.5% (25.01°)                                                       | 99.7% (25.01°)                                                       |
| Refinement method                         | Full-matrix least-squares on $F^2$                                   |                                                                      |
| Data / restraints / parameters            | 5876 / 0 / 329                                                       | 5215 / 0 / 329                                                       |
| Goodness-of-fit on $F^2$                  | 1.028                                                                | 1.036                                                                |
| Final R indices [ $I > 2\sigma(I)$ ]      | $R_1 = 0.0949$ , $wR_2 = 0.1778$                                     | $R_1 = 0.0827$ , $wR_2 = 0.1574$                                     |
| R indices (all data)                      | $R_1 = 0.0638$ , $wR_2 = 0.2034$                                     | $R_1 = 0.0586$ , $wR_2 = 0.1777$                                     |
| Largest diff. peak and hole               | 1.347 and -0.640 e.Å <sup>-3</sup>                                   | 1.628 and -0.771 e.Å <sup>-3</sup>                                   |

$$R_1 = \frac{\sum ||F_o| - |F_c||}{\sum |F_o|}, wR_2 = \left[ \frac{\sum (|F_o|^2 - |F_c|^2)^2}{\sum (F_o^2)} \right]^{1/2}$$

**Table S3** Selected bond lengths (Å) and angles (deg) of **1**

| Complex           | <b>1</b>   |
|-------------------|------------|
| Bond length (Å)   |            |
| Co1–N1            | 2.046(10)  |
| Co1–N2            | 2.051(9)   |
| Co1–N3            | 2.174(8)   |
| Co1–N4            | 2.184(8)   |
| Co1–N5            | 2.024(3)   |
| Bond angles (deg) |            |
| N1–Co1–N2         | 101.60(13) |
| N1–Co1–N3         | 79.34(34)  |
| N1–Co1–N4         | 115.95(34) |
| N1–Co1–N5         | 128.73(28) |
| N2–Co1–N3         | 115.44(34) |
| N2–Co1–N4         | 80.20(34)  |
| N2–Co1–N5         | 129.64(25) |
| N3–Co1–N4         | 156.63(32) |
| N3–Co1–N5         | 77.31(32)  |
| N4–Co1–N5         | 79.32(32)  |

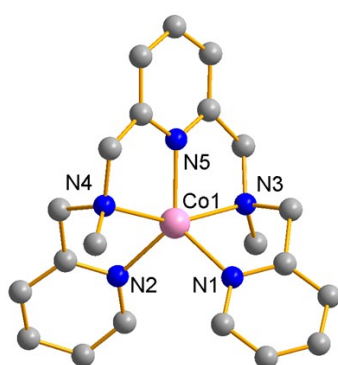**Fig. S1** The atom label of cations of complex **1**.

**Table S4** Selected bond lengths (Å) and angles (deg) of **2** and [Zn(N3Py2)(OH<sub>2</sub>)](ClO<sub>4</sub>)<sub>2</sub>

| Complex           | <b>2</b>   | Complex           | [Zn(N3Py2)(OH <sub>2</sub> )](ClO <sub>4</sub> ) <sub>2</sub> |
|-------------------|------------|-------------------|---------------------------------------------------------------|
| Bond length (Å)   |            | Bond length (Å)   |                                                               |
| Co1–N1            | 2.157(3)   | Zn1–N1            | 2.188(4)                                                      |
| Co1–N2            | 2.165(4)   | Zn1–N2            | 2.132(4)                                                      |
| Co1–N3            | 2.245(5)   | Zn1–N3            | 2.256(4)                                                      |
| Co1–N4            | 2.142(3)   | Zn1–N4            | 2.262(3)                                                      |
| Co1–N5            | 2.233(4)   | Zn1–N5            | 2.155(4)                                                      |
| Co1–O1            | 2.146(3)   | Zn1–O1            | 2.175(3)                                                      |
| Bond angles (deg) |            | Bond angles (deg) |                                                               |
| N1–Co1–N2         | 103.90(14) | N1–Zn1–N2         | 99.39(14)                                                     |
| N1–Co1–N3         | 81.71(15)  | N1–Zn1–N3         | 76.03(14)                                                     |
| N1–Co1–N4         | 153.98(15) | N1–Zn1–N4         | 127.44(13)                                                    |
| N1–Co1–N5         | 80.92(14)  | N1–Zn1–N5         | 104.10(15)                                                    |
| N1–Co1–O1         | 96.34(15)  | N1–Zn1–O1         | 84.13(13)                                                     |
| N2–Co1–N3         | 75.86(13)  | N2–Zn1–N3         | 94.40(16)                                                     |
| N2–Co1–N4         | 99.38(13)  | N2–Zn1–N4         | 76.64(14)                                                     |
| N2–Co1–N5         | 173.43(14) | N2–Zn1–N5         | 154.61(15)                                                    |
| N2–Co1–O1         | 85.44(13)  | N2–Zn1–O1         | 95.96(14)                                                     |
| N3–Co1–N4         | 92.99(14)  | N3–Zn1–N4         | 110.48(14)                                                    |
| N3–Co1–N5         | 109.54(13) | N3–Zn1–N5         | 82.19(16)                                                     |
| N3–Co1–O1         | 160.04(13) | N3–Zn1–O1         | 158.87(14)                                                    |
| N4–Co1–N5         | 76.91(13)  | N4–Zn1–N5         | 81.02(14)                                                     |
| N4–Co1–O1         | 96.94(13)  | N4–Zn1–O1         | 89.84(13)                                                     |
| N5–Co1–O1         | 89.61(13)  | N5–Zn1–O1         | 95.88(16)                                                     |

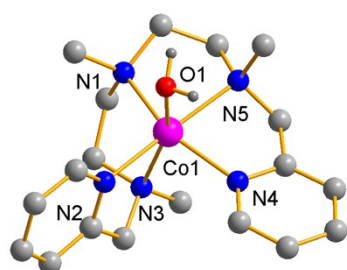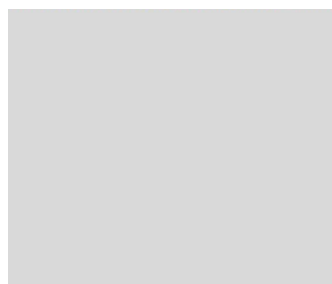**Fig. S2** The atom label of cations of complex **2** (left) and [Zn(N3Py2)(OH<sub>2</sub>)](ClO<sub>4</sub>)<sub>2</sub> (right).

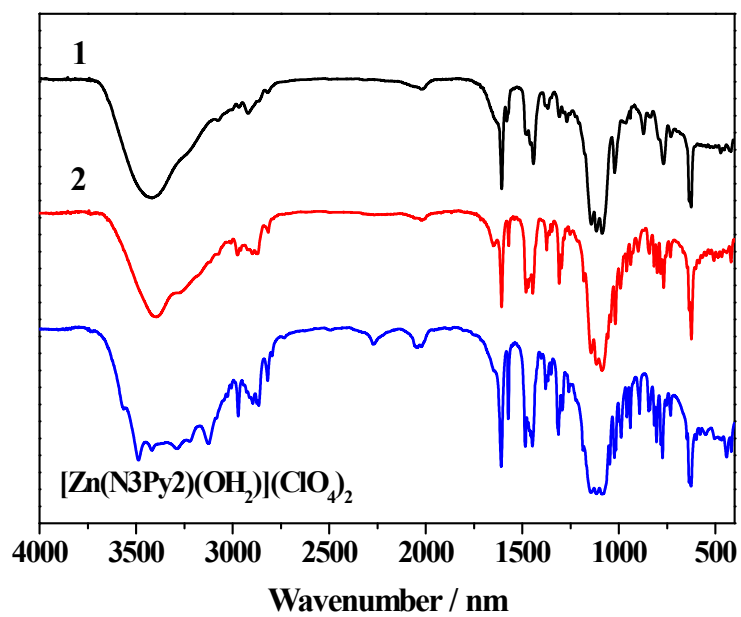

Fig. S3 Infrared spectra of complex 1, 2, and  $[\text{Zn}(\text{N3Py2})(\text{OH}_2)](\text{ClO}_4)_2$ .

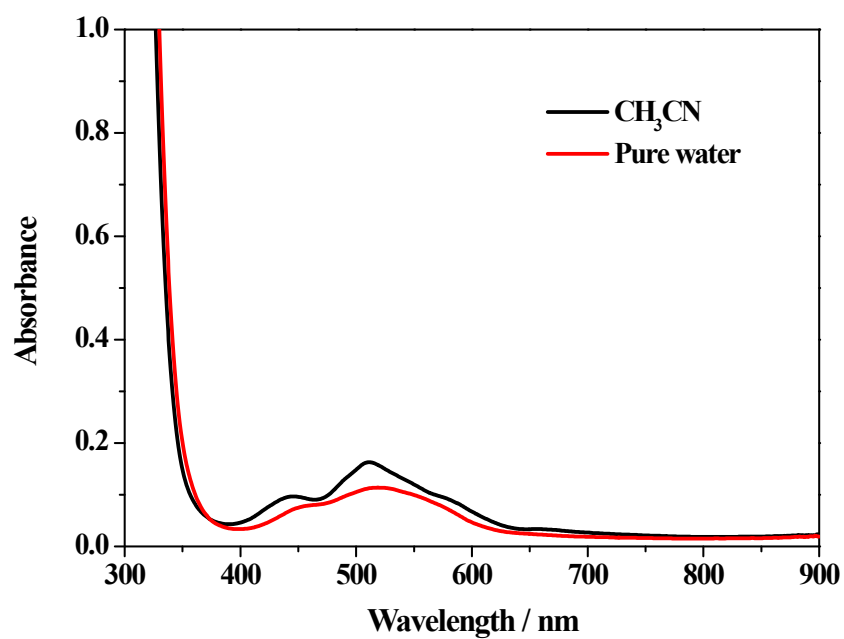

Fig. S4 UV-vis absorption spectra of 5 mM of complex 1 in  $\text{CH}_3\text{CN}$  and pure water.

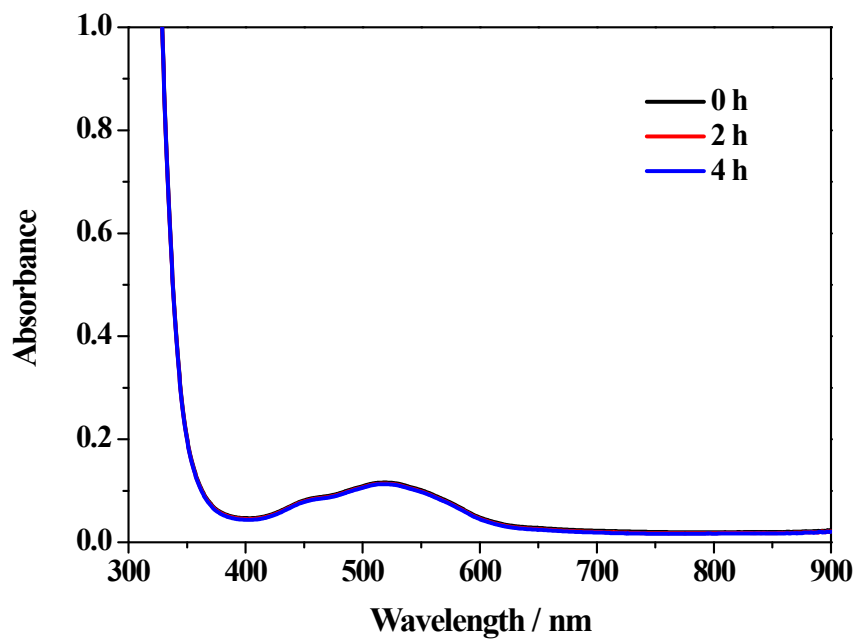

**Fig. S5** UV-vis absorption spectra of 5 mM of complex 1 with different aging time in PBS at pH 3.0.

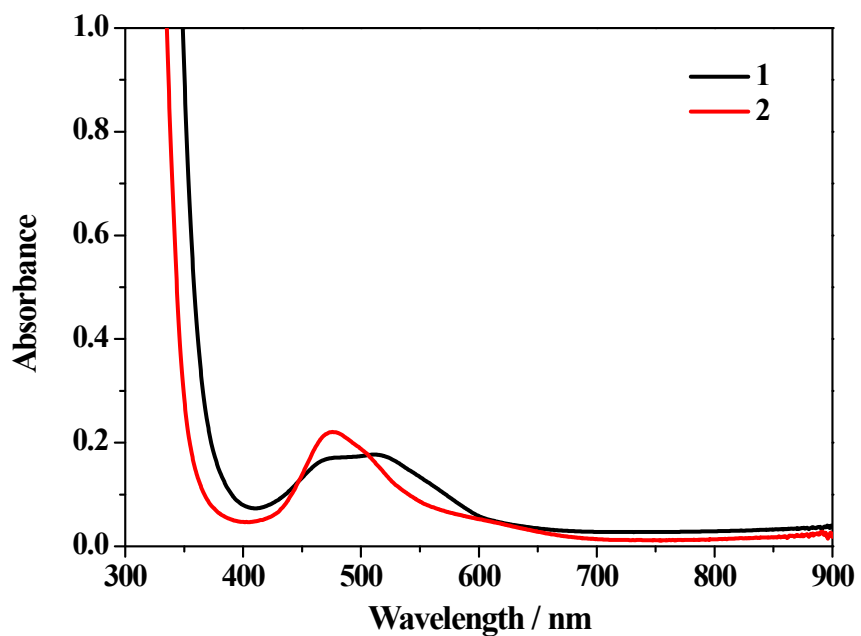

**Fig. S6** UV-visible absorption spectra of complex 1 and 2 in 0.1 M phosphate buffer solution (PBS) at pH 11.0.

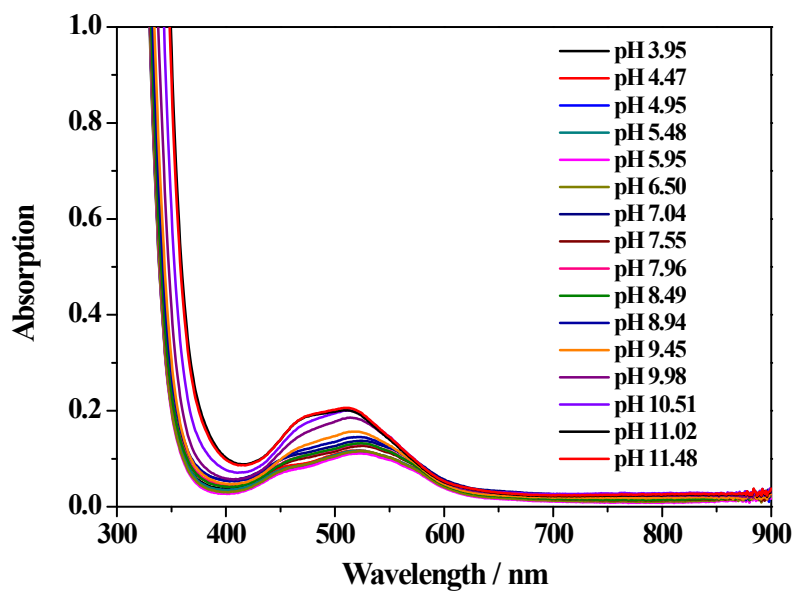

Fig. S7 pH dependent UV-vis spectra of 5 mM of complex 1 in 0.1 M PBS.

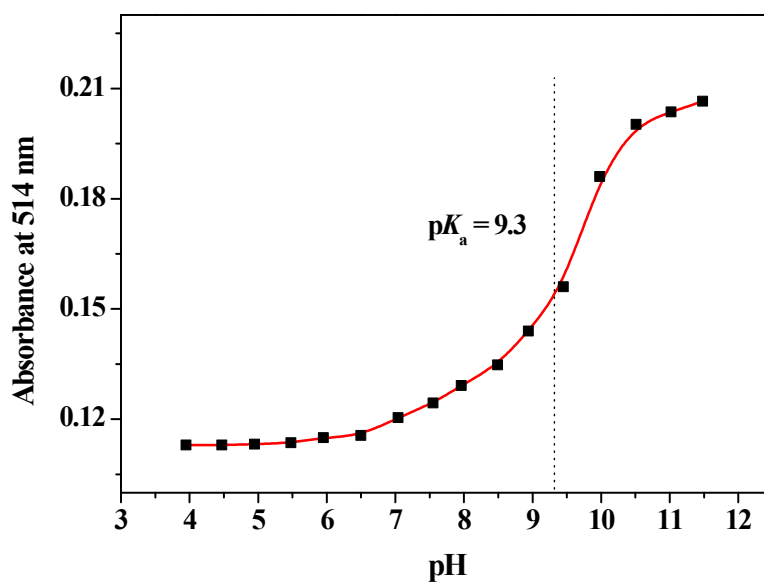

Fig. S8 Representative plot of the absorbance at 514 nm of complex 1 vs. pH value of 0.1 M PBS.

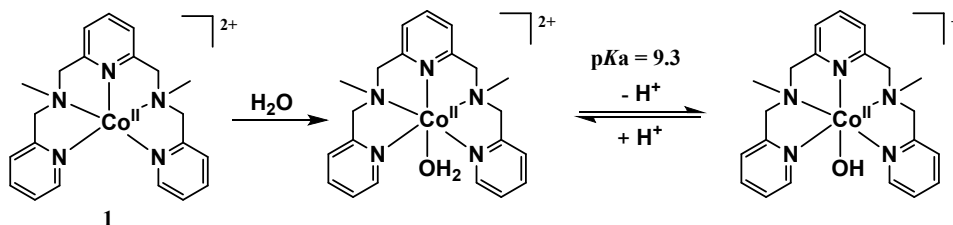

Fig. S9 Protonation-deprotonation equilibrium of complex 1 in 0.1 M PBS.



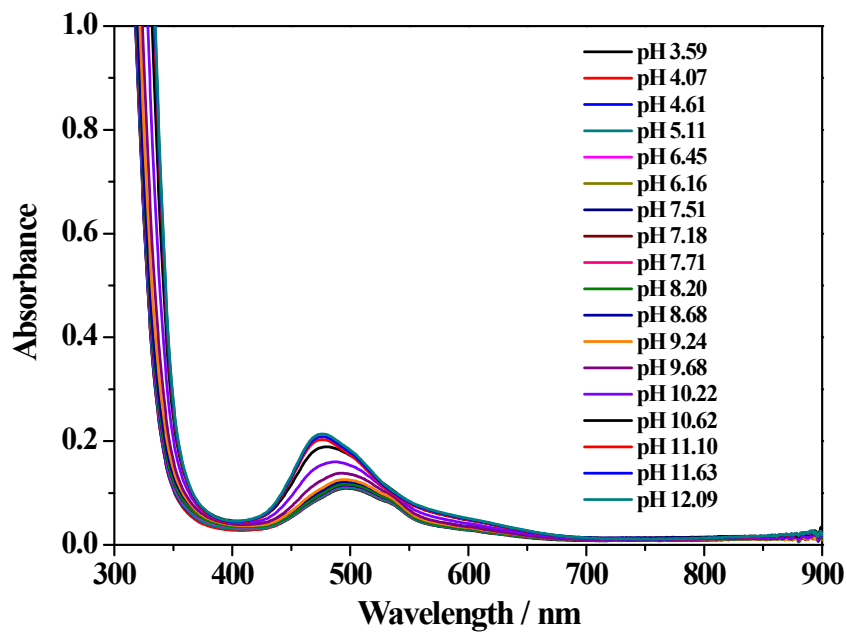

Fig. S10 pH dependent UV-vis spectra of 5 mM of complex **2** in 0.1 M PBS.

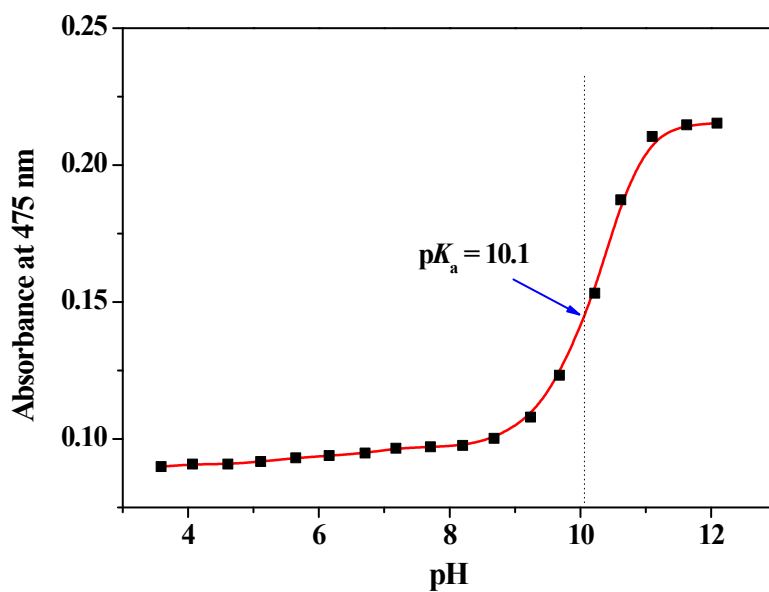

Fig. S11 Representative plot of the absorbance at 475 nm of complex **2** vs. pH value of 0.1 M PBS.

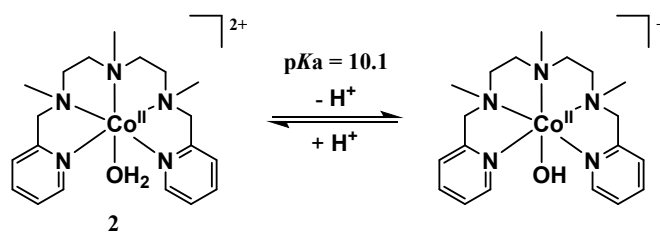

Fig. S12 Protonation–deprotonation equilibrium of complex **2** in 0.1 M PBS.

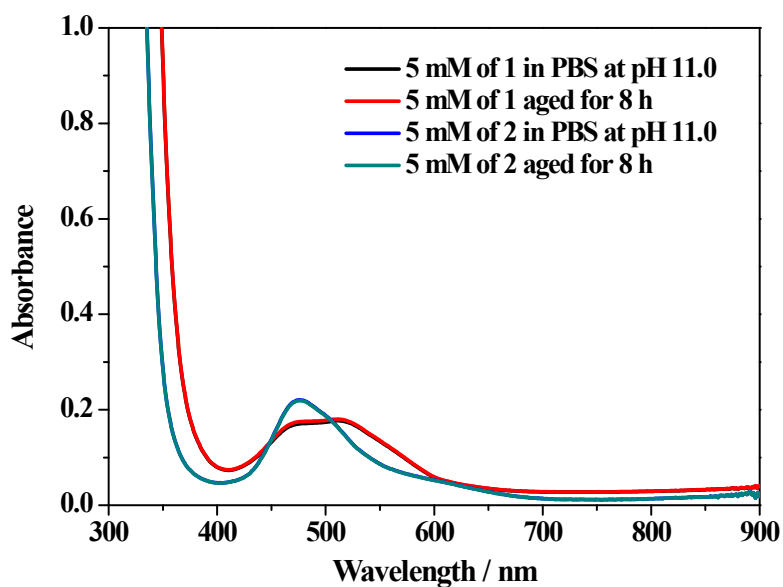

**Fig. S13** UV-vis absorption spectra of 5 mM of complex **1** and **2** in 0.1 M PBS at pH 11.0 before and after 8 hours aging time.

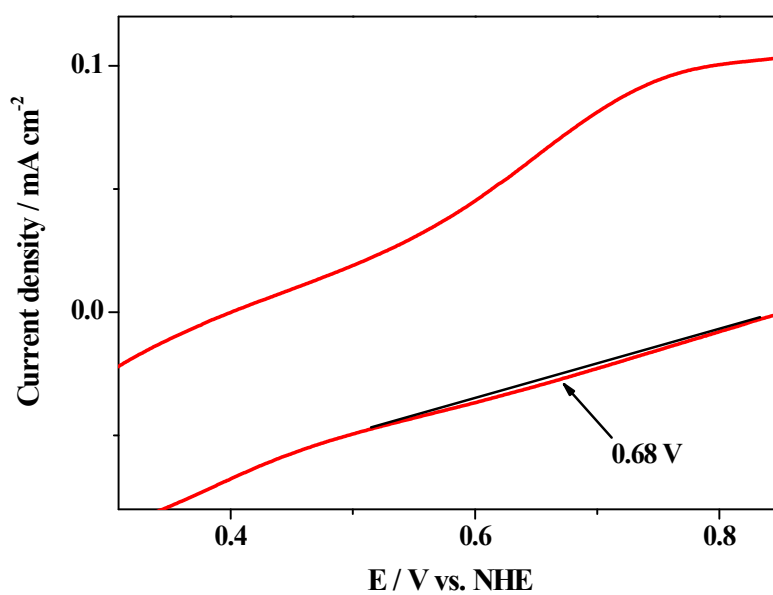

**Fig. S14** CV curves of 1 mM of complexes **1** in 0.1 M PBS at pH 11.0, GC electrode as working electrode, scan rate = 100 mV/s.

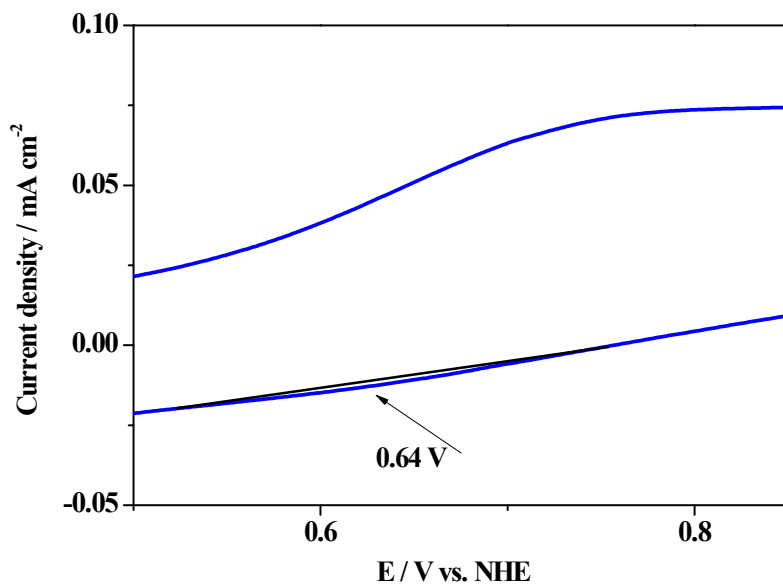

**Fig. S15** CV curves of 1 mM of complexes **2** in 0.1 M PBS at pH 11.0, GC electrode as working electrode, scan rate = 100 mV/s.

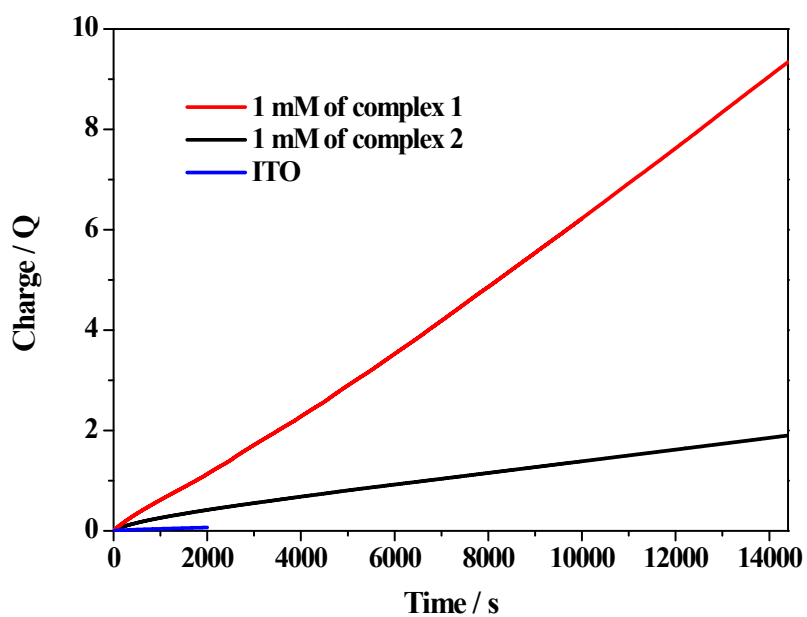

**Fig. S16** Chronocoulometric ( $Q = \text{charge vs. time}$ ) plot from controlled potential electrolysis with 1 mM of **1** or 1 mM of **2** at ITO working electrode and pH 11.0 (0.1 M PBS) at an applied potential of 1.55 V vs. NHE. A charge-versus-time trace for the background ITO electrode is also shown.

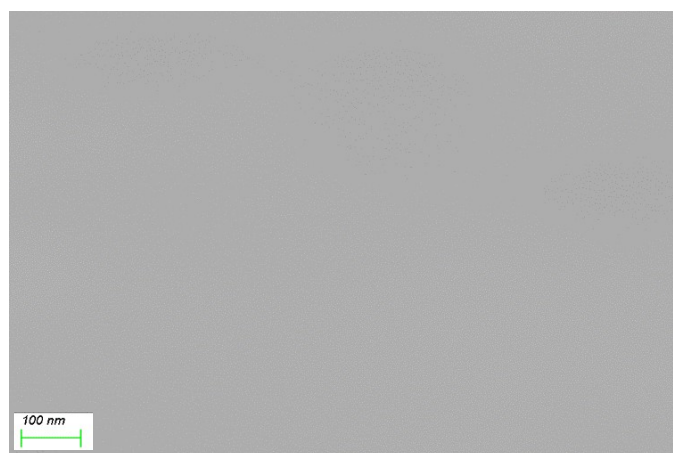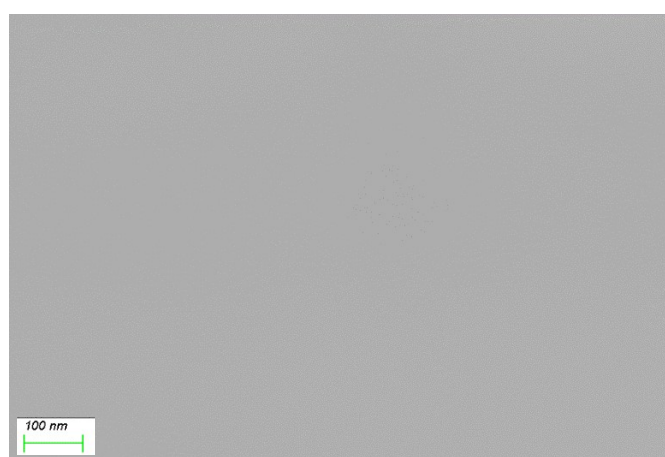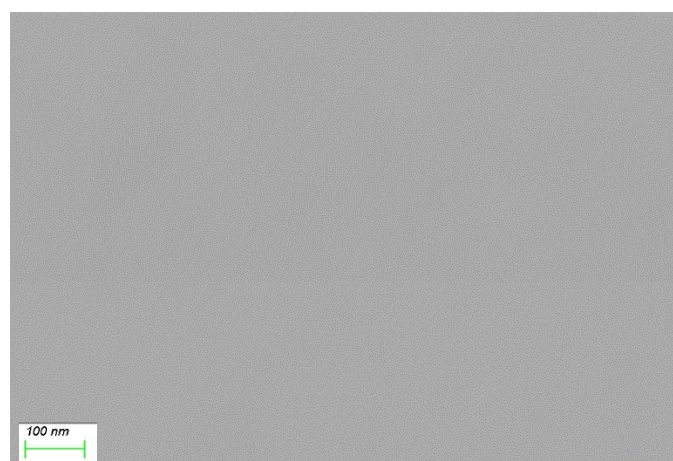

**Fig. S17** SEM images of the surface of ITO electrode before (top) and after 4 h CPE experiments of 1 mM of **1** (middle) and 1 mM of **2** (bottom) in 0.1 M PBS at pH 11.0.

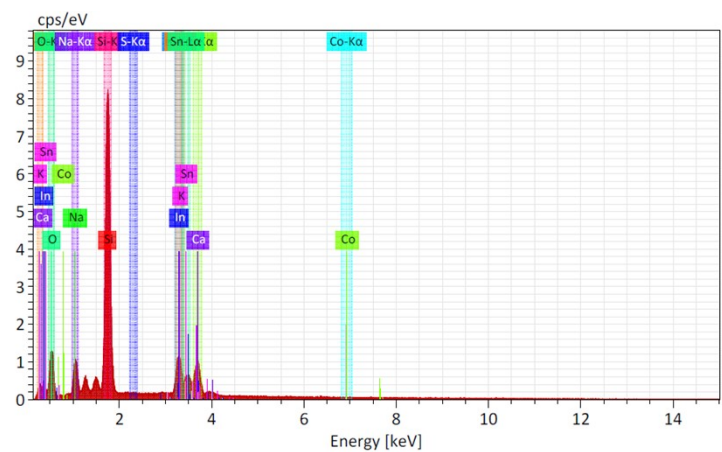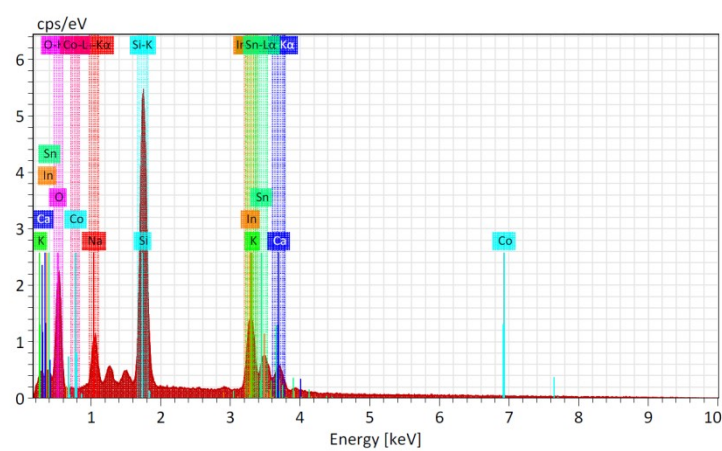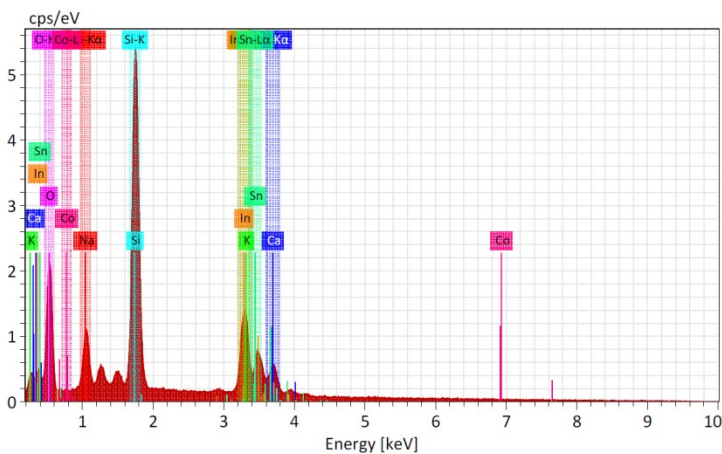

**Fig. S18** EDX analysis of the surface of ITO electrode before (top) and after 4 h CPE experiments of 1 mM of **1** (middle) and 1 mM of **2** (bottom) in 0.1 M PBS at pH 11.0.

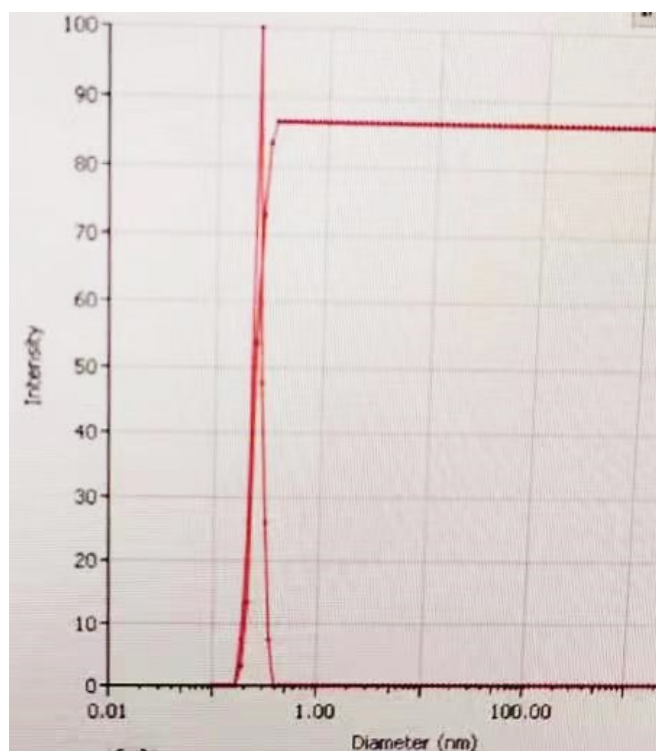

**Fig. S19** Dynamic light scattering (DLS) measurement of the electrolyte solutions after 4 h CPE experiment of complex **1**. The signal at diameter below 1 nm is ascribed to the background signal of true solution.<sup>1</sup>

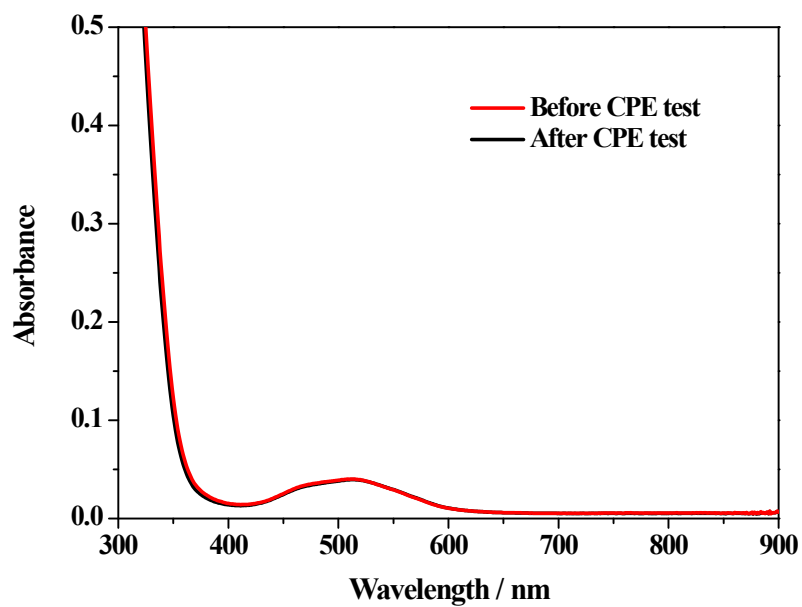

**Fig. S20** UV-vis absorbance spectra of 1 mM of complex **1** before and after 4 h CPE test at 1.55 V vs. NHE, 0.1 M PBS at pH 11.0 was used as electrolyte.

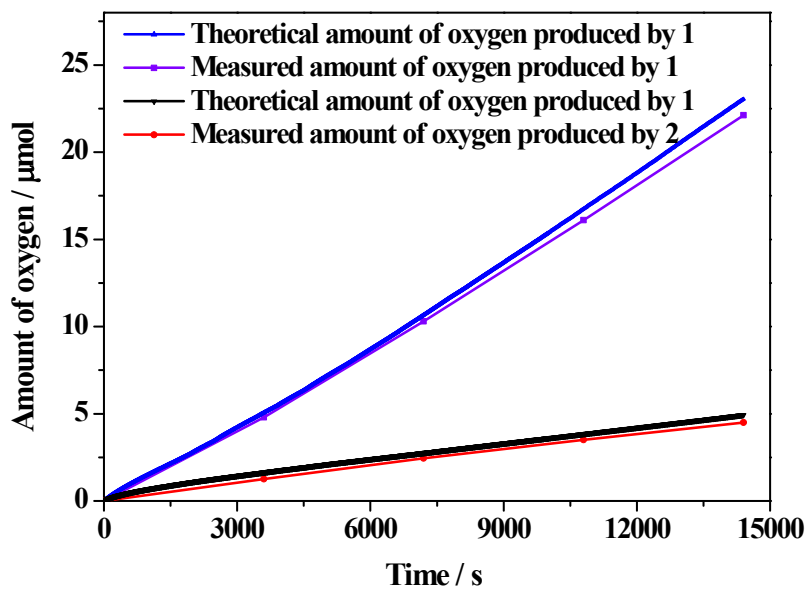

**Fig. S21** Faradaic efficiency of  $\text{O}_2$  evolution for complex **1** and complex **2** under electrolysis of 14400 s at 1.55 V (vs. NHE) in 0.1 M PBS at pH 11.0.

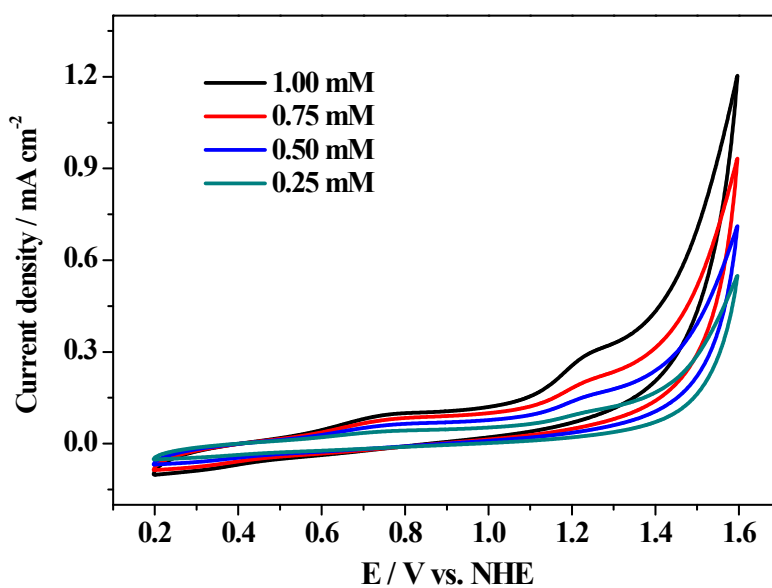

**Fig. S22** CV of complex **1** with various concentrations in 0.1 M PBS at pH 11.0.

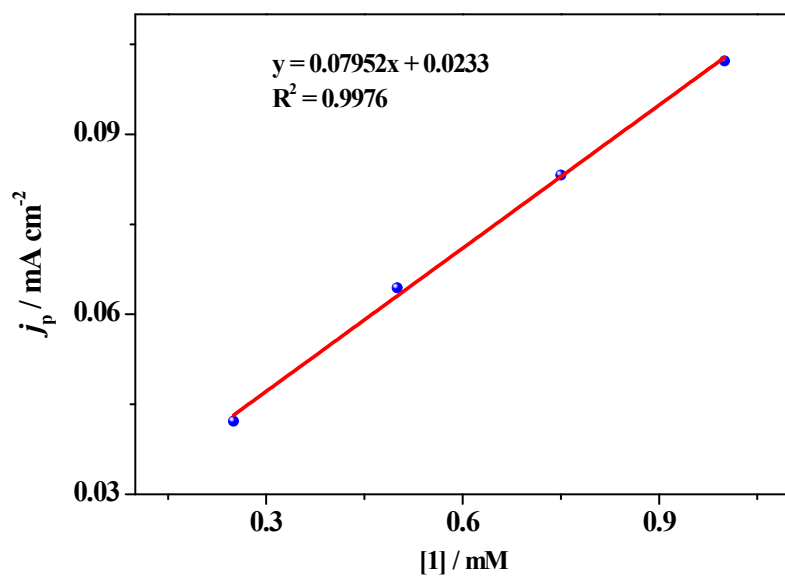

**Fig. S23** Relationship between current of anodic wave and concentration of complex **1**, scan rate = 100 mV/s, 0.1 M PBS at pH 11.0 as electrolyte.

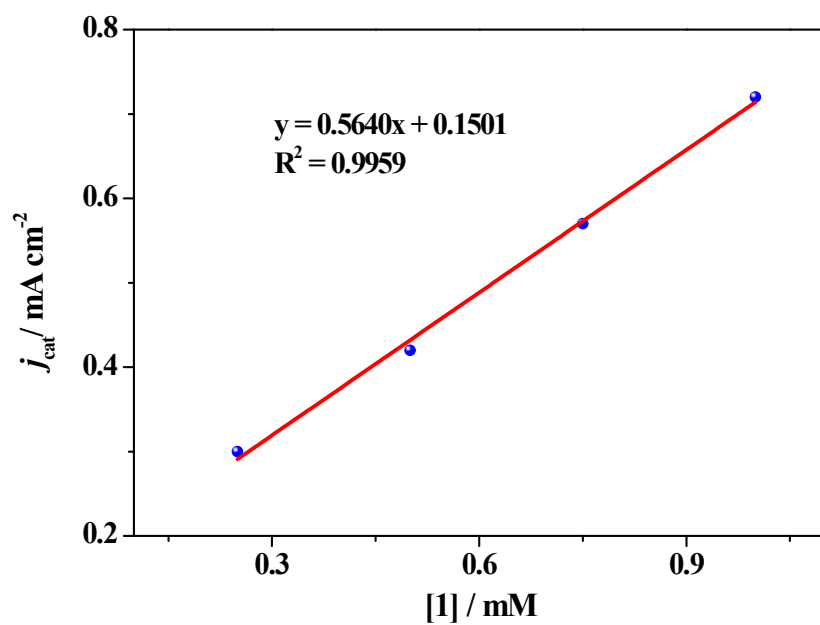

**Fig. S24** Relationship between current density at 1.55 V vs. NHE and concentration of complex **1**, scan rate = 100 mV/s, 0.1 M PBS at pH 11.0 as electrolyte.



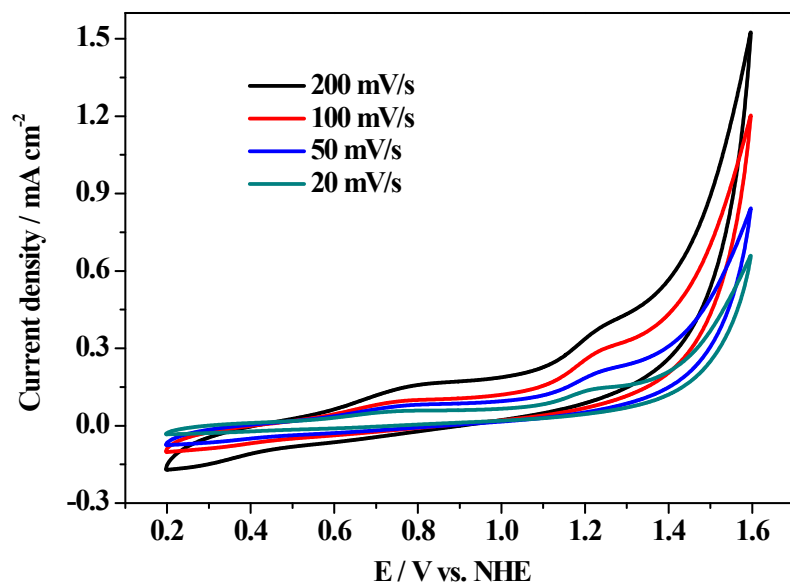

Fig. S25 CV of 1.0 mM of **1** with various scan rates, 0.1 M PBS at pH 11.0 as electrolyte.

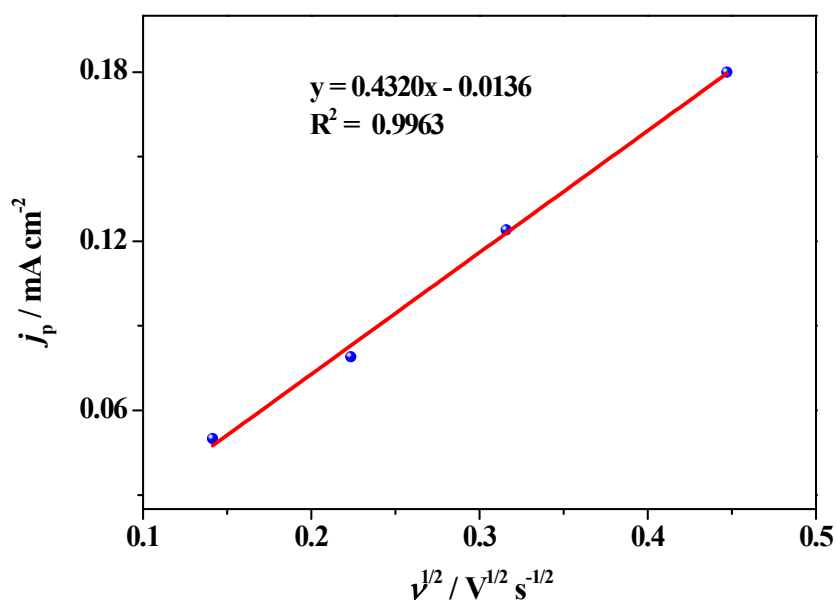

Fig. S26 Dependence of oxidation wave current density of the non-catalytic process of 1 mM of **1** on the square root of scan rates, 0.1 M PBS at pH 11.0 as electrolyte.

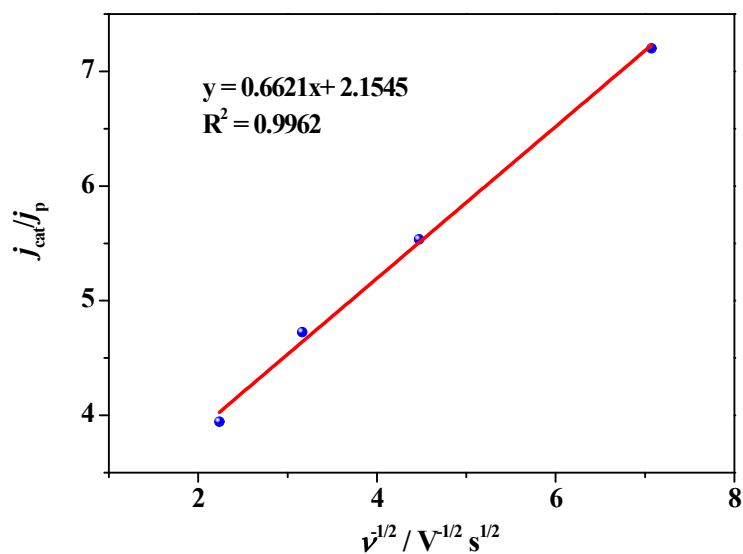

**Fig. S27** Plots of the ratio of  $j_{cat}$  to  $j_p$  of complex **1** versus the reciprocal of the square root of scan rate.

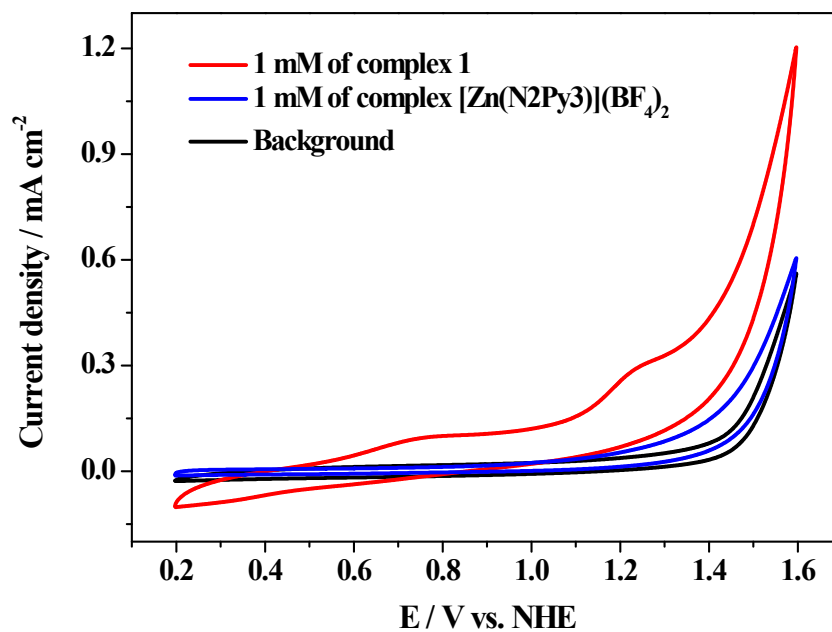

**Fig. 28** CV curves of 1 mM of complexes **1** and  $[Zn(N2Py3)](BF_4)_2$  in 0.1 M PBS at pH 11.0, GC electrode as working electrode, scan rate = 100 mV/s.

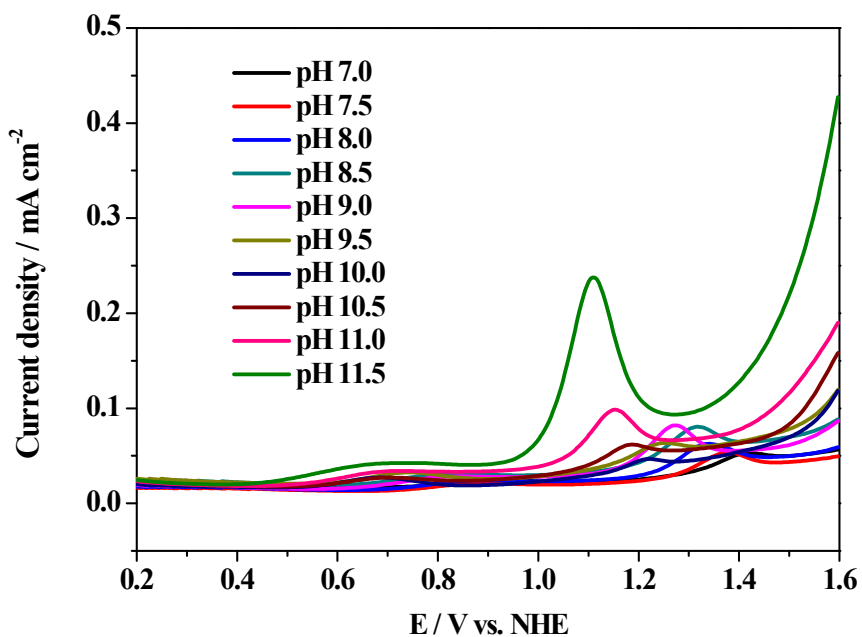

**Fig. S29** Differential pulse voltammetry (DPV) examination of 1 mM complex **1** in 0.1 M PBS at various pH values.

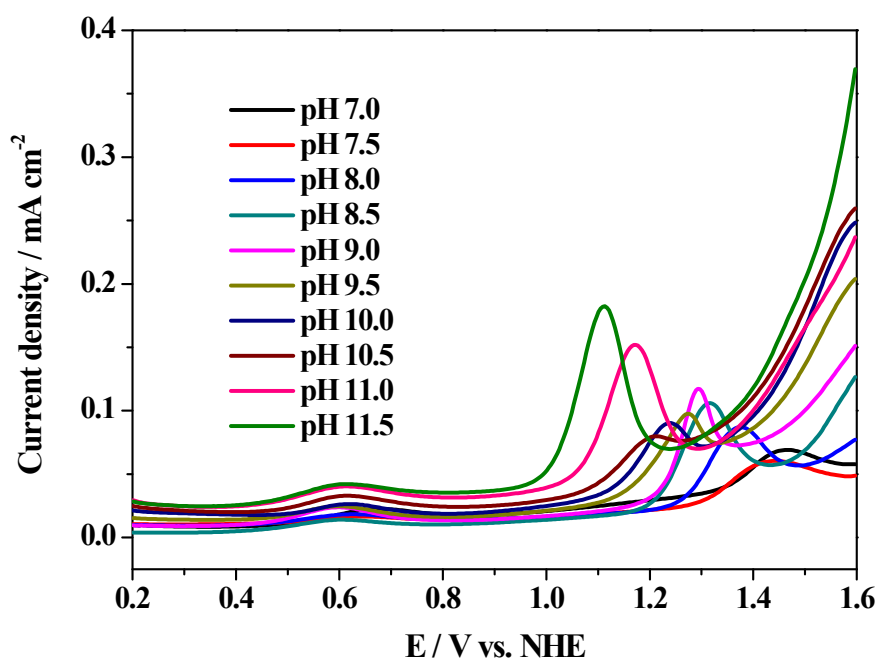

**Fig. S30** Differential pulse voltammetry (DPV) examination of 1 mM complex **2** in 0.1 M PBS at various pH values.

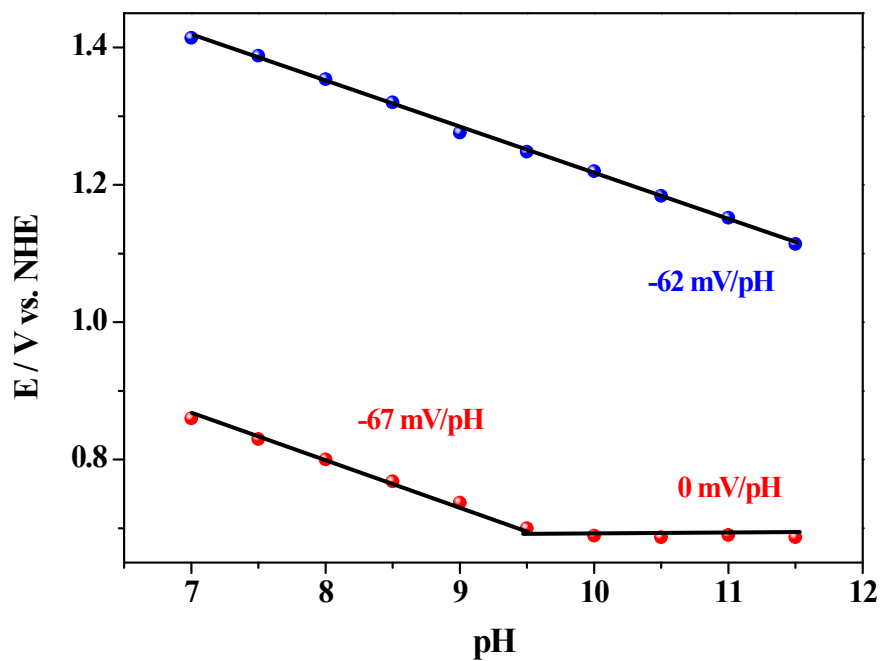

**Fig. S31** The relationship between the potential of each redox couple of complex 1 and the pH value of electrolyte.

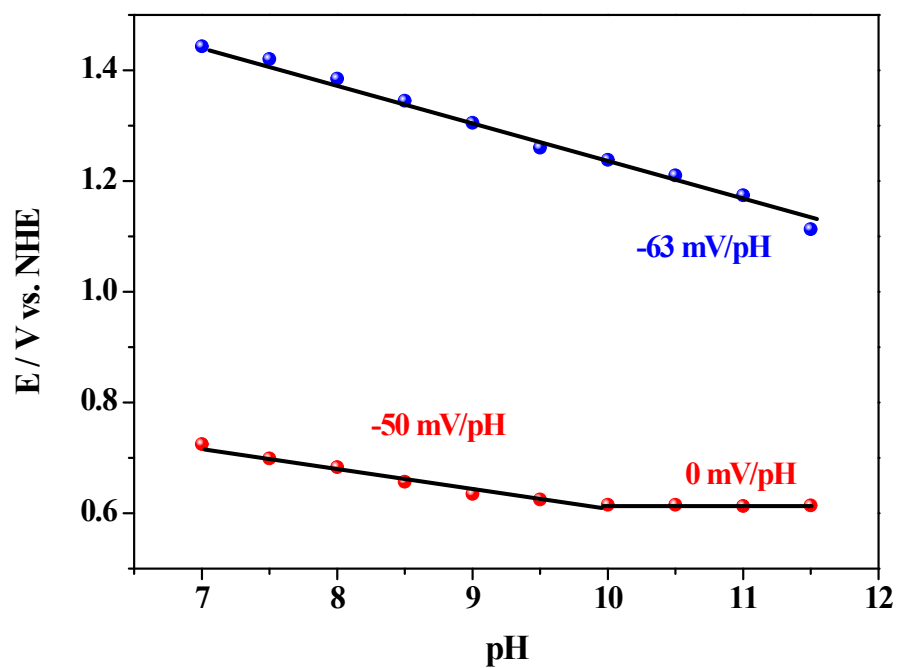

**Fig. S32** The relationship between the potential of each redox couple of complex 2 and the pH value of electrolyte.

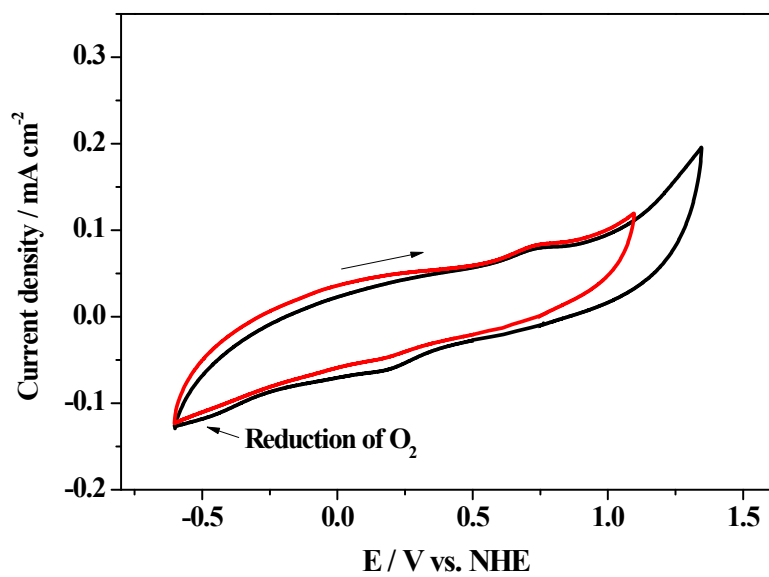

**Fig. S33** The reduction process of oxygen production by ligand-assistant water oxidation catalyzed by complex **1**.

#### Reference

- S1 L. Wang, L. Duan, R. B. Ambre, Q. Daniel, H. Chen, J. Sun. B. Das, A. Thapper, J. Uhlig, P. Dinér and L. Sun, *J. Catal.*, 2016, **335**, 72–78.
